# Supplementary material for: Genomic correlates of clinical outcome in advanced prostate cancer
Source: PubMed Central journal article supplement — Proc Natl Acad Sci U S A. 2019 May 6;116(23):11428–36. doi: 10.1073/pnas.1902651116 (PMC6561293; doi:10.1073/pnas.1902651116), 2019-05-06
Supplement: pnas.1902651116.sapp.pdf [file pnas.1902651116.sapp.pdf]

## Supplementary Information Table of Contents

|           | Page  |
|-----------|-------|
| Figure S1 | 2     |
| Figure S2 | 3     |
| Figure S3 | 4     |
| Figure S4 | 5     |
| Figure S5 | 6     |
| Figure S6 | 7     |
| Figure S7 | 8     |
| Figure S8 | 9     |
| Table S1  | 10    |
| Table S2  | 11-12 |
| Table S3  | 13    |

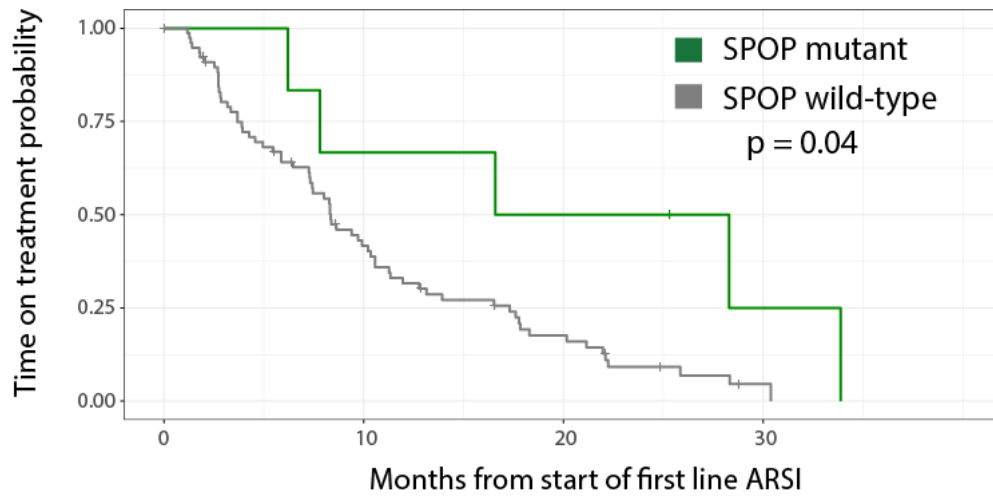

**Figure S1:** Kaplan-Meier analysis showing time on treatment with first-line ARSI for SPOP wild-type and SPOP-mutated tumors. P-value was generated from the logrank statistic.

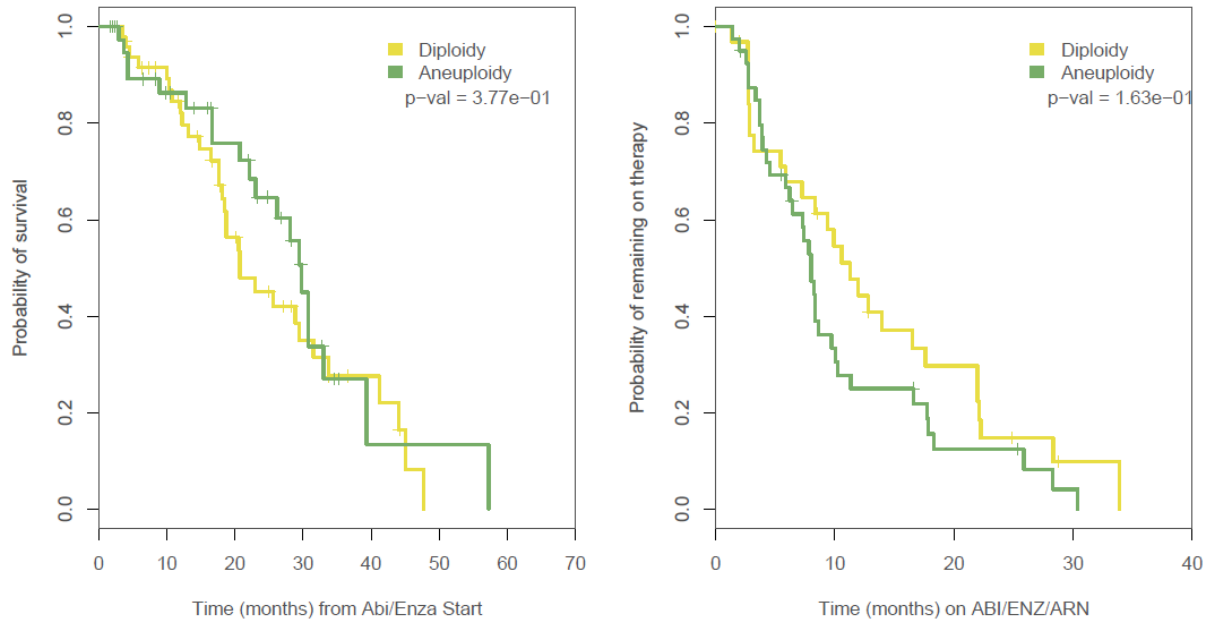

**Figure S2:** Kaplan-Meier analysis showing overall survival and time on treatment with first-line ARSI for diploid and aneuploid tumors. P-value was generated from the logrank statistic.

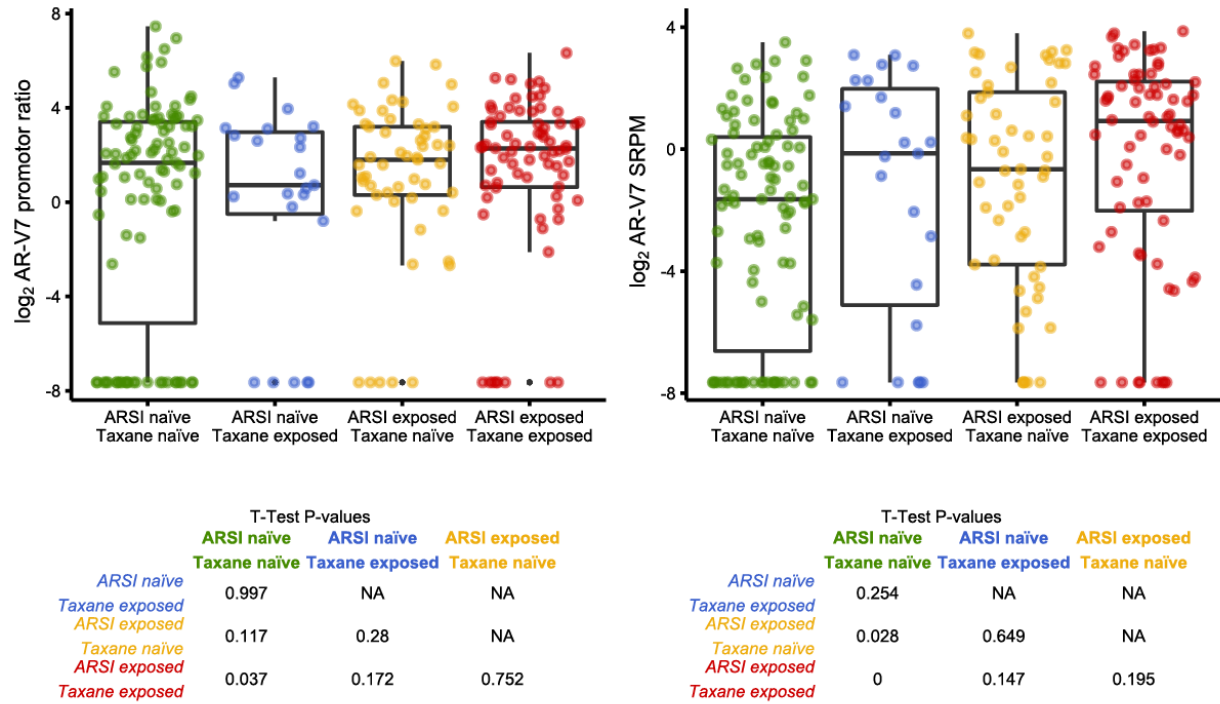

**Figure S3:** AR-V7 levels in relation to prior treatment exposure. AR-V7 level detected in PolyA libraries as ratio of AR-V7 reads / AR promoter 1-2 (Left) and as splice reads per million (SRPM) (Right) in relation to ARSI and taxane treatment exposure. AR-V7 expression is higher in tumors exposed to both an ARSI and a taxane relative to tumors that are naïve to both agents. P-values were generated using unpaired t-tests.

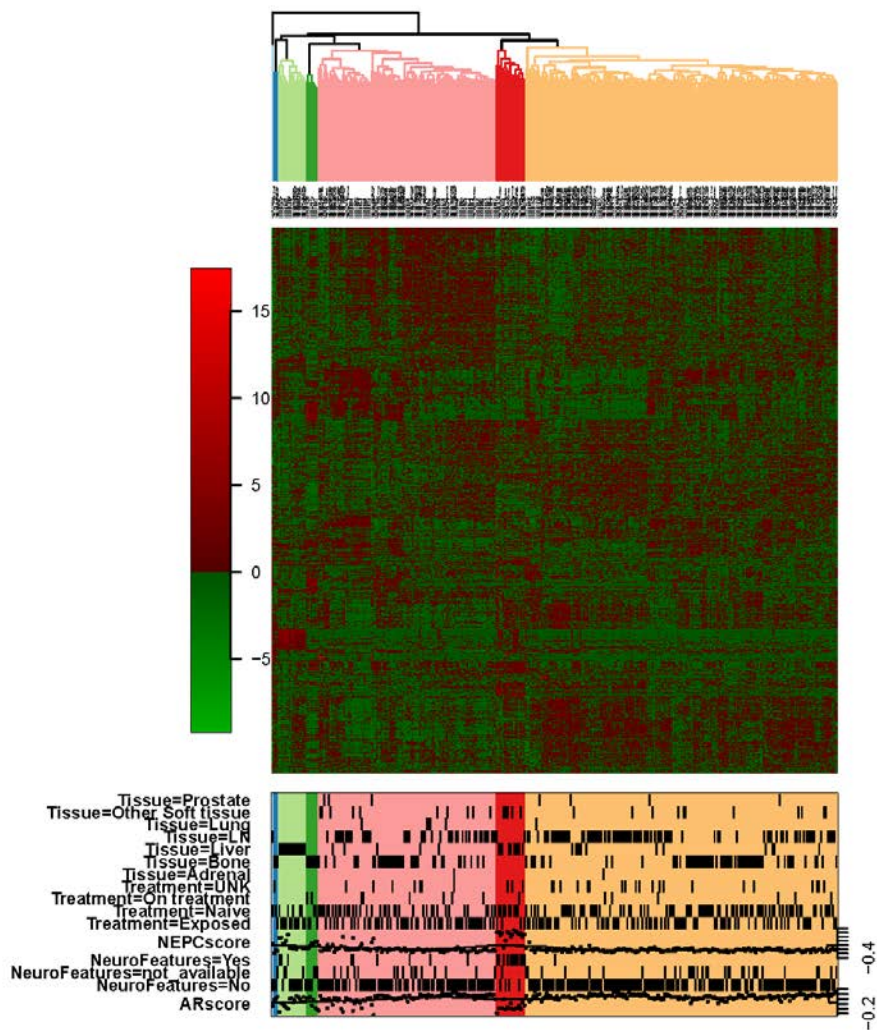

**Figure S4:** Unsupervised gene expression clustering analysis of study cohort using Pearson’s correlation as metric. Analysis includes approximately 13,000 transcripts that passed a cross-cohort variance filter. The dendrogram identifies a cluster of tumors with high NEPC expression score. No clusters enriched for exposure to ARSIs were detected.

**A**

|                  | Path_Adeno | Path_NE         | Fisher Test |          |
|------------------|------------|-----------------|-------------|----------|
| nepc score < .4  | 240        | 7               | OR          | 80.50    |
| nepc score >= .4 | 6          | 15              | p-value     | 5.82E-15 |
| <hr/>            |            |                 |             |          |
|                  | other      | P53.alt/RB1.alt |             |          |
| nepc score < .4  | 282        | 18              | OR          | 9.92     |
| nepc score >= .4 | 14         | 9               | p-value     | 1.91E-05 |
| <hr/>            |            |                 |             |          |
|                  | other      | P53.alt/RB1.alt |             |          |
| Path_Adeno       | 230        | 16              | OR          | 11.75    |
| Path_NE          | 12         | 10              | p-value     | 3.81E-06 |

**B**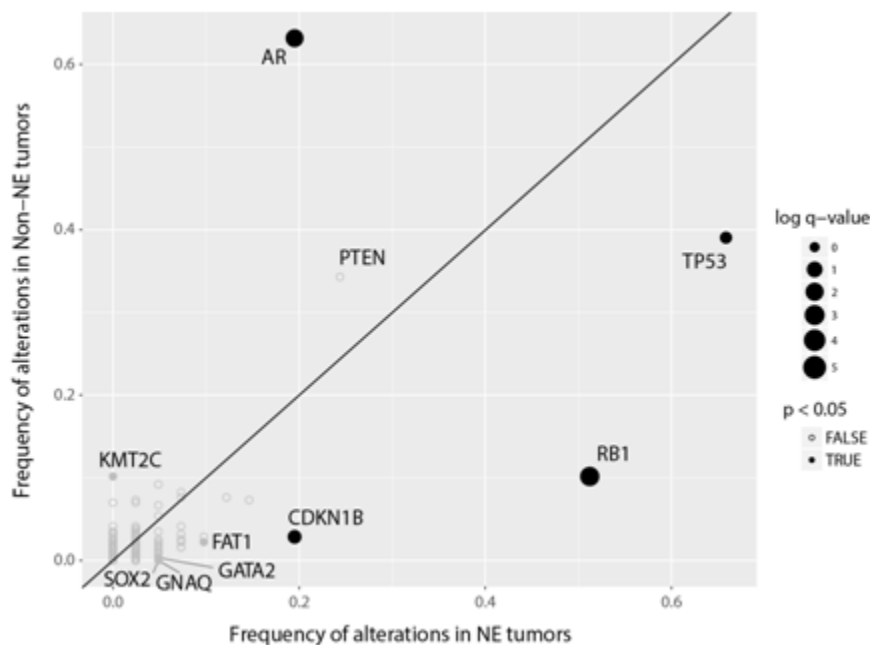

**Figure S5: A.** Associations between histopathology, NEPC expression score and TP53/RB1 genomic status. Top panel: Association between NEPC score low (<4) and high (>=4) tumors and histopathologic classification (Adenocarcinoma versus NE features). Middle panel: Association between NEPC score and genomic co-alteration in TP53 and RB1. Bottom panel: association between histopathologic classification and genomic co-alteration in TP53 and RB1. **B.** Enrichment of genomic alterations in histopathologic NE tumors versus non-NE (CRPC-adenocarcinoma) tumors.

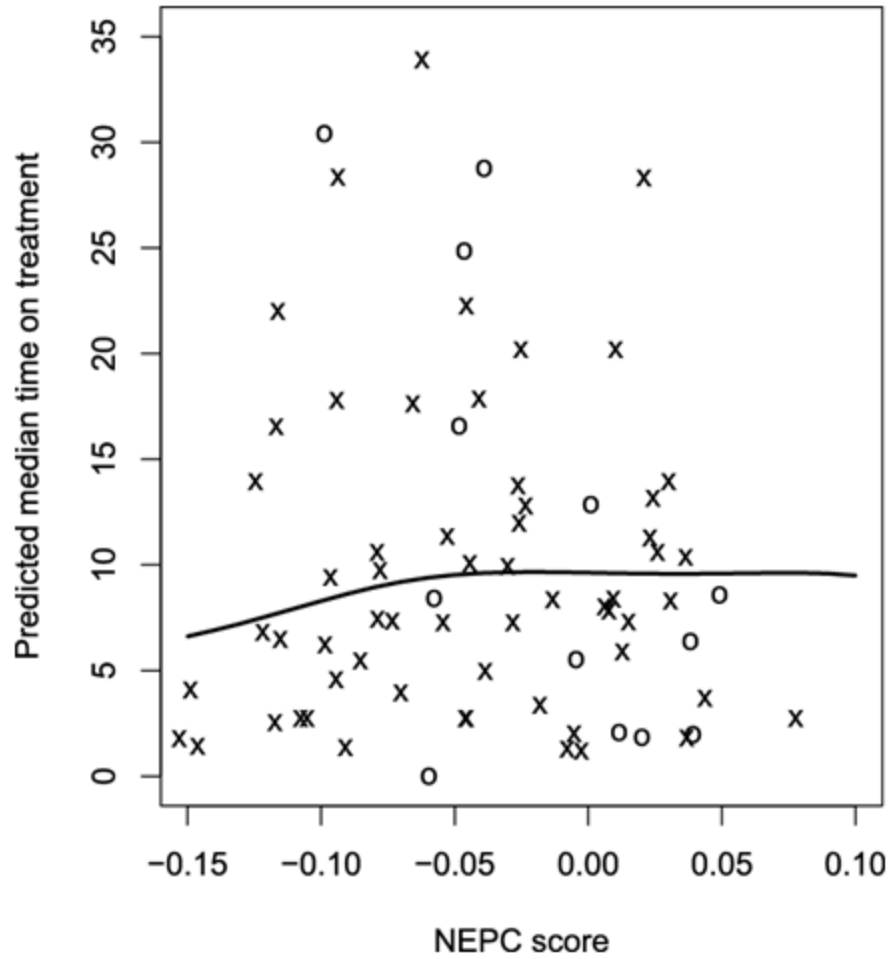

**Figure S6:** Association between NEPC score and time on treatment with a first-line ARSI for mCRPC. A p-value of 0.36 was derived from the distribution of the maximum logrank test statistic, for a NEPC score cutpoint of -0.02 that produced that maximum logrank statistic. X = off treatment event. O = censored event.

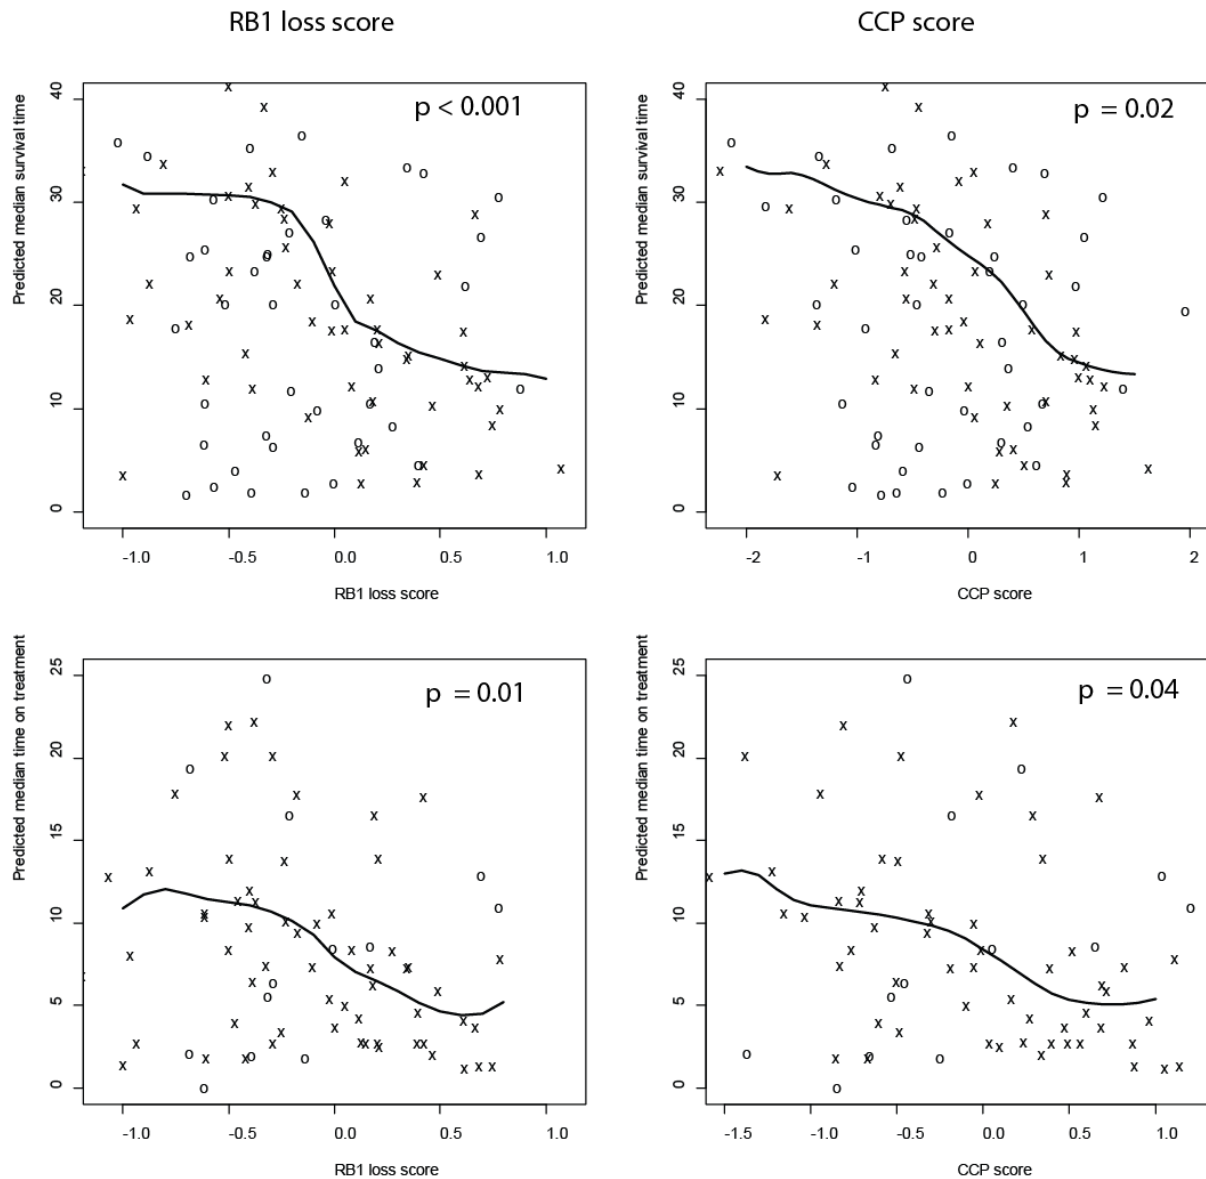

**Figure S7:** Association of RB1 loss score (left) and cell cycle progression (CCP) expression score (right) with overall survival from start of first-line ARSI (top) and time on treatment with first-line ARSI (bottom). P-values are derived from the logrank statistic. X = off treatment event. O = censored event.



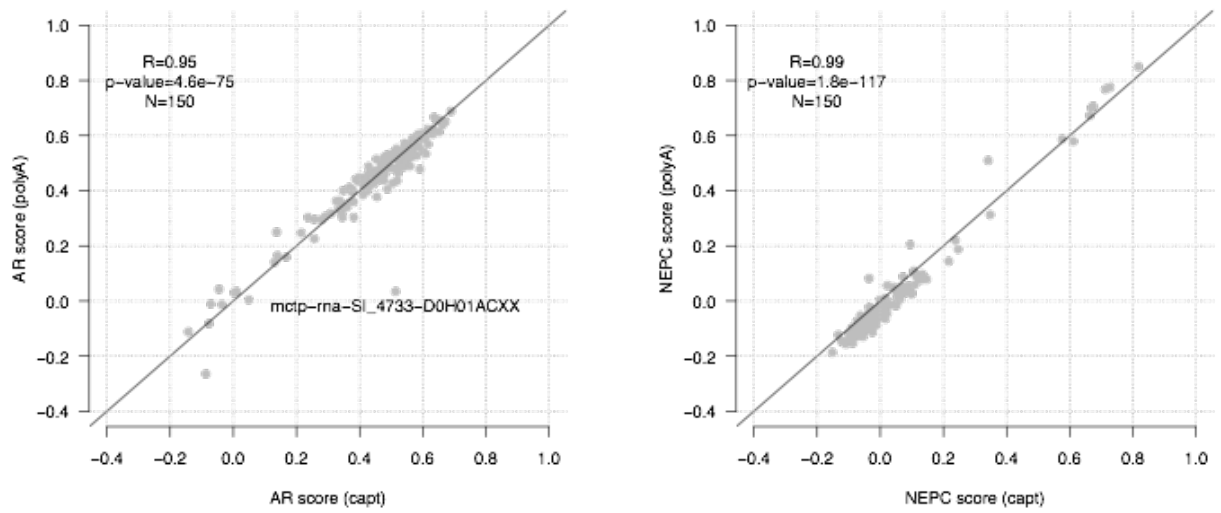

**Figure S8:** Correlation between expression scores derived from PolyA RNA sequencing libraries (Y-Axis) versus capture libraries (X-Axis) for AR output scores (left plot) and NEPC scores (right plot).

| <b>Clinical characteristic<br/>(N = 429 subjects)</b>            | <b>Value</b>        |
|------------------------------------------------------------------|---------------------|
| Median age at diagnosis (range)<br>(Unknown for N = 50 patients) | 61 (38-89)          |
| Median age at biopsy (range)<br>(Unknown for N = 15 patients)    | 67 (39-95)          |
| Gleason score at diagnosis                                       |                     |
| 6                                                                | N = 27 (6%)         |
| 7                                                                | N = 103 (24%)       |
| 8-10                                                             | N = 214 (50%)       |
| Unknown                                                          | N = 85 (20%)        |
| Median PSA at diagnosis (range)<br>(Unknown for N = 81 patients) | 14.0 (<0.05-16,275) |
| Median OS from biopsy                                            | 16.2 months         |

**Table S1:** Summary clinical characteristics for 429 patients with metastatic CRPC who underwent successful tumor profiling.

| <b>Gene_ID</b> | <b>Pathway</b> | <b>Alterations included</b> |
|----------------|----------------|-----------------------------|
| ATM            | DNA repair     | ATM:homdel mut              |
| ATR            | DNA repair     | atr:homdel mut              |
| BRCA1          | DNA repair     | brca1:homdel mut            |
| BRCA2          | DNA repair     | brca2:homdel mut            |
| CDK12          | DNA repair     | cdk12:homdel mut            |
| FANCA          | DNA repair     | fanca:homdel mut            |
| MRE11A         | DNA repair     | mre11:mut                   |
| PALB2          | DNA repair     | palb2:mut                   |
| CCND1          | CELL CYCLE     | ccnd1:mut amp               |
| CDK4           | CELL CYCLE     | cdk4:mut amp                |
| CDKN1B         | CELL CYCLE     | cdkn1b:mut homdel           |
| RB1            | CELL CYCLE     | rb1:mut homdel              |
| CDKN2A         | CELL CYCLE     | cdkn2a:mut homdel           |
| ARID1A         | Epigenetic     | ARID1A:mut                  |
| ARID2          | Epigenetic     | ARID2:mut                   |
| ARID4A         | Epigenetic     | ARID4A:mut                  |
| KDM6A          | Epigenetic     | KDM6A:mut                   |
| KMT2A          | Epigenetic     | KMT2A:mut                   |
| KMT2C          | Epigenetic     | KMT2C:mut                   |
| KMT2D          | Epigenetic     | KMT2D:mut                   |
| MBD1           | Epigenetic     | MBD1:mut                    |
| SETD2          | Epigenetic     | SETD2:mut                   |
| SETDB1         | Epigenetic     | SETDB1:mut                  |
| SMARCA1        | Epigenetic     | SMARCA1:mut                 |
| SMARCAD1       | Epigenetic     | SMARCAD1:mut                |
| AKT1           | PI3K           | AKT1:AMP MUT                |
| MTOR           | PI3K           | MTOR:MUT                    |
| PIK3CA         | PI3K           | PIK3CA:AMP MUT              |

|        |          |                   |
|--------|----------|-------------------|
| PIK3CB | PI3K     | PIK3CB:AMP MUT    |
| PIK3R1 | PI3K     | PIK3R1:HOMDEL MUT |
| PIK3R2 | PI3K     | PIK3R2:AMP MUT    |
| PIK3R3 | PI3K     | PIK3R3:HOMDEL MUT |
| PTEN   | PI3K     | PTEN:HOMDEL MUT   |
| TSC1   | PI3K     | TSC1:HOMDEL MUT   |
| TSC2   | PI3K     | TSC2:HOMDEL MUT   |
| BRAF   | RAS/MAPK | braf:mut amp      |
| HRAS   | RAS/MAPK | hras:mut amp      |
| KRAS   | RAS/MAPK | kras:mut amp      |
| MAP2K1 | RAS/MAPK | map2k1:mut        |
| MAP3K1 | RAS/MAPK | map3k1:mut        |
| NF1    | RAS/MAPK | nf1:mut homdel    |
| RASA1  | RAS/MAPK | rasa1:mut homdel  |
| APC    | WNT      | apc:mut homdel    |
| AXIN1  | WNT      | axin1:mut homdel  |
| AXIN2  | WNT      | axin2:mut homdel  |
| CTNNB1 | WNT      | ctnnb1:mut        |
| RNF43  | WNT      | rnf43:mut homdel  |
| ZNRF3  | WNT      | znrf3:mut homdel  |

**Table S2:** Pathway classifications of genes altered in mCRPC. Indicated are gene names, pathway in which the gene/protein is functional based on current knowledge, and gene alterations that are considered potentially biologically-relevant for that gene.

| <u>Gene ID</u> | <u>Type of manual copy number assessment</u> |
|----------------|----------------------------------------------|
| APC            | HOMDEL                                       |
| AR             | AMP                                          |
| ATM            | HOMDEL                                       |
| BRCA1          | HOMDEL                                       |
| BRCA2          | HOMDEL                                       |
| CDK12          | HOMDEL                                       |
| CDKN1B         | HOMDEL                                       |
| CDKN2A         | HOMDEL                                       |
| CHD1           | HOMDEL                                       |
| FANCA          | HOMDEL                                       |
| MLH1           | HOMDEL                                       |
| MSH2           | HOMDEL                                       |
| NKX3-1         | HOMDEL                                       |
| PIK3CB         | AMP                                          |
| PIK3R1         | HOMDEL                                       |
| PTEN           | HOMDEL                                       |
| RB1            | HOMDEL                                       |
| TP53           | HOMDEL                                       |
| ZBTB16         | HOMDEL                                       |
| ZFHX3          | HOMDEL                                       |

**Table S3:** Genes that underwent secondary manual copy number assessment. AMP = amplification. HOMDEL = homozygous deletion
